# Supplementary material for: Modeling the global atmospheric transport and deposition of mercury to the Great Lakes
Source: Oxford University Press journal article supplement (doi:10.12952/journal.elementa.000118), 2016-01-01
Supplement: elementa_000118_s001.docx [file elementa_000118_s001.docx]

Text S1. Discussion of Bromine Chemistry

The current version of HYSPLIT-Hg does not include the potential oxidation of Hg(0) by bromine (Br/BrO), in part because of uncertainty in estimating the concentrations of reactive bromine in the atmosphere (De Simone et al., 2014; Saiz-Lopez and von Glasow, 2012; Simpson et al., 2015). Bromine is used as the primary oxidant in GEOS-Chem-Hg (Br option) (e.g., Song et al., 2015) and in sensitivity studies with CTM-Hg (Seigneur and Lohman, 2008), ECHMERIT (De Simone et al., 2015), and WRF/Chem (Gencarelli et al., 2015). Bromine along with other oxidants (e.g., OH• and O3) have been used in other analyses, including GEOS-Chem (Kikuchi et al., 2013), CMAQ-Hg (Zhu et al., 2015), CAM-Chem-Hg (Lei et al., 2013, as a sensitivity analysis), and a recent version of GRAHM (Kos et al., 2013). Many recent atmospheric mercury model analyses, like the present analysis, do not include bromine-mediated oxidation. Examples include GEOS-Chem (O3-OH option) (e.g., Weiss-Penzias et al., 2015), CMAQ-Hg (Baker and Bash, 2012; Bieser et al., 2014; Holloway et al., 2012; Lin et al., 2012; Myers et al., 2013; Zhu et al., 2015), CTM-Hg (base version) (Lohman et al., 2008; Seigneur et al., 2006; Seigneur et al., 2004) , DEHM (Christensen et al., 2004; Hansen et al., 2015), ECHMERIT (base version) (De Simone et al., 2015; De Simone et al., 2014), GLEMOS (non-polar regions) (Bieser et al., 2014), MSCE-HM (Travnikov, 2005), REMSAD (e.g., Bullock et al., 2008), TEAM (Bullock et al., 2008), and WRF/Chem (base version) (Gencarelli et al., 2014; Gencarelli et al., 2015). Whatever the chemical mechanism used, most atmospheric mercury models have relatively similar, overall, net Hg(0) oxidation rates, as they are constrained by the net emissions of Hg(0) and the measured concentrations of Hg(0) in the atmosphere.

Some studies have found that the use of bromine produced similar results to using O3/OH• as oxidants (De Simone et al., 2015; Holmes et al., 2010). Gencarelli et al. (2015) found an improvement in model estimated wet deposition results using a Br/BrO oxidation mechanism, but the overestimated wet deposition found with the O3/OH• mechanism was produced using the (relatively fast) nominal reaction rates discussed above. As will be seen below, even with the relatively “slow” rates for the O3 and OH• oxidation reactions used in this work, the HYSPLIT-Hg model tends to produce ground-level concentrations of non-Hg(0) mercury forms (Hg(II) , Hg(p), and Hg2s) equal to or greater than those measured.

Baker KR, Bash JO. 2012. Regional scale photochemical model evaluation of total mercury wet deposition and speciated ambient mercury. *Atmospheric Environment* **49**: 151-162. doi:10.1016/j.atmosenv.2011.12.006.

Bieser J, De Simone F, Gencarelli C, Geyer B, Hedgecock I, et al. 2014. A diagnostic evaluation of modeled mercury wet depositions in Europe using atmospheric speciated high-resolution observations. *Environmental Science and Pollution Research* **21**(16): 9995-10012. doi:10.1007/s11356-014-2863-2.

Bullock OR, Jr., Atkinson D, Braverman T, Civerolo K, Dastoor A, et al. 2008. The North American Mercury Model Intercomparison Study (NAMMIS): Study description and model-to-model comparisons. *Journal of Geophysical Research-Atmospheres* **113**(D17). doi:10.1029/2008jd009803.

Christensen JH, Brandt J, Frohn LM, Skov H. 2004. Modelling of mercury in the Arctic with the Danish Eulerian Hemispheric Model. *Atmospheric Chemistry and Physics* **4**: 2251-2257.

De Simone F, Cinnirella S, Gencarelli CN, Yang X, Hedgecock IM, et al. 2015. Model Study of Global Mercury Deposition from Biomass Burning. *Environmental Science & Technology* **49**(11): 6712-6721. doi:10.1021/acs.est.5b000969.

De Simone F, Gencarelli CN, Hedgecock IM, Pirrone N. 2014. Global atmospheric cycle of mercury: a model study on the impact of oxidation mechanisms. *Environmental Science and Pollution Research* **21**(6): 4110-4123. doi:10.1007/s11356-013-2451-x.

Gencarelli CN, De Simone F, Hedgecock IM, Sprovieri F, Pirrone N. 2014. Development and application of a regional-scale atmospheric mercury model based on WRF/Chem: a Mediterranean area investigation. *Environmental Science and Pollution Research* **21**(6): 4095-4109. doi:10.1007/s11356-013-2162-3.

Gencarelli CN, De Simone F, Hedgecock IM, Sprovieri F, Yang X, et al. 2015. European and Mediterranean mercury modelling: Local and long-range contributions to the deposition flux. *Atmospheric Environment* **117**: 162-168. doi:10.1016/j.atmosenv.2015.07.015.

Hansen KM, Christensen JH, Brandt J. 2015. The Influence of Climate Change on Atmospheric Deposition of Mercury in the Arctic-A Model Sensitivity Study. *International Journal of Environmental Research and Public Health* **12**(9): 11254-11268. doi:10.3390/ijerph120911254.

Holloway T, Voigt C, Morton J, Spak SN, Rutter AP, et al. 2012. An assessment of atmospheric mercury in the Community Multiscale Air Quality (CMAQ) model at an urban site and a rural site in the Great Lakes Region of North America. *Atmospheric Chemistry and Physics* **12**(15): 7117-7133. doi:10.5194/acp-12-7117-2012.

Holmes CD, Jacob DJ, Corbitt ES, Mao J, Yang X, et al. 2010. Global atmospheric model for mercury including oxidation by bromine atoms. *Atmospheric Chemistry and Physics* **10**(24): 12037-12057. doi:10.5194/acp-10-12037-2010.

Kikuchi T, Ikemoto H, Takahashi K, Hasome H, Ueda H. 2013. Parameterizing Soil Emission and Atmospheric Oxidation-Reduction in a Model of the Global Biogeochemical Cycle of Mercury. *Environmental Science & Technology* **47**(21): 12266-12274. doi:10.1021/es401105h.

Kos G, Ryzhkov A, Dastoor A, Narayan J, Steffen A, et al. 2013. Evaluation of discrepancy between measured and modelled oxidized mercury species. *Atmospheric Chemistry and Physics* **13**(9): 4839-4863. doi:10.5194/acp-13-4839-2013.

Lei H, Liang XZ, Wuebbles DJ, Tao Z. 2013. Model analyses of atmospheric mercury: present air quality and effects of transpacific transport on the United States. *Atmospheric Chemistry and Physics* **13**(21): 10807-10825. doi:10.5194/acp-13-10807-2013.

Lin C-J, Shetty SK, Pan L, Pongprueksa P, Jang C, et al. 2012. Source attribution for mercury deposition in the contiguous United States: Regional difference and seasonal variation. *Journal of the Air & Waste Management Association* **62**(1): 52-63. doi:10.1080/10473289.2011.622066.

Lohman K, Seigneur C, Gustin M, Lindberg S. 2008. Sensitivity of the global atmospheric cycle of mercury to emissions. *Applied Geochemistry* **23**(3): 454-466. doi:10.1016/j.apgeochem.2007.12.022.

Myers T, Atkinson RD, Bullock OR, Jr., Bash JO. 2013. Investigation of effects of varying model inputs on mercury deposition estimates in the Southwest US. *Atmospheric Chemistry and Physics* **13**(2): 997-1009. doi:10.5194/acp-13-997-2013.

Saiz-Lopez A, von Glasow R. 2012. Reactive halogen chemistry in the troposphere. *Chemical Society Reviews* **41**(19): 6448-6472. doi:10.1039/c2cs35208g.

Seigneur C, Lohman K. 2008. Effect of bromine chemistry on the atmospheric mercury cycle. *Journal of Geophysical Research-Atmospheres* **113**(D23). doi:10.1029/2008jd010262.

Seigneur C, Vijayaraghavan K, Lohman K. 2006. Atmospheric mercury chemistry: Sensitivity of global model simulations to chemical reactions. *Journal of Geophysical Research-Atmospheres* **111**(D22). doi:10.1029/2005jd006780.

Seigneur C, Vijayaraghavan K, Lohman K, Karamchandani P, Scott C. 2004. Global source attribution for mercury deposition in the United States. *Environmental Science & Technology* **38**(2): 555-569. doi:10.1021/es034109t.

Simpson WR, Brown SS, Saiz-Lopez A, Thornton JA, von Glasow R. 2015. Tropospheric Halogen Chemistry: Sources, Cycling, and Impacts. *Chemical Reviews* **115**(10): 4035-4062. doi:10.1021/cr5006638.

Song S, Selin NE, Soerensen AL, Angot H, Artz R, et al. 2015. Top-down contraints on atmospheric mercury emissions and implications for global biogeochemical cycling. *Atmos Chem Phys* **15**: 7103-7125.

Travnikov O. 2005. Contribution of the intercontinental atmospheric transport to mercury pollution in the Northern Hemisphere. *Atmospheric Environment* **39**(39): 7541-7548. doi:10.1016/j.atmosenv.2005.07.066.

Weiss-Penzias P, Amos HM, Selin NE, Gustin MS, Jaffe DA, et al. 2015. Use of a global model to understand speciated atmospheric mercury observations at five high-elevation sites. *Atmospheric Chemistry and Physics* **15**(3): 1161-1173. doi:10.5194/acp-15-1161-2015.

Zhu J, Wang T, Bieser J, Matthias V. 2015. Source attribution and process analysis for atmospheric mercury in eastern China simulated by CMAQ-Hg. *Atmospheric Chemistry and Physics* **15**(15): 8767-8779. doi:10.5194/acp-15-8767-2015.
