# Supplementary material for: Modeling the global atmospheric transport and deposition of mercury to the Great Lakes
Source: Oxford University Press journal article supplement (doi:10.12952/journal.elementa.000118), 2016-01-01

**Figure S3. Modeled vs. measured 2005 wet deposition for all model configurations**

Measured vs. modeled comparisons are shown for the base case – same data as shown in Figure 6 in the main paper -- and all other model configurations. As with Figure 6 in the main paper, sites in different regions (defined in Figure 5 in the main paper) are shown with different symbols. The different configurations (1A, 1B, 1C, etc.) are summarized in Table 3 of the main paper. Statistical summaries of these wet deposition comparisons are shown in Table S2 and S3. The 1:1 line is also shown in each comparison.


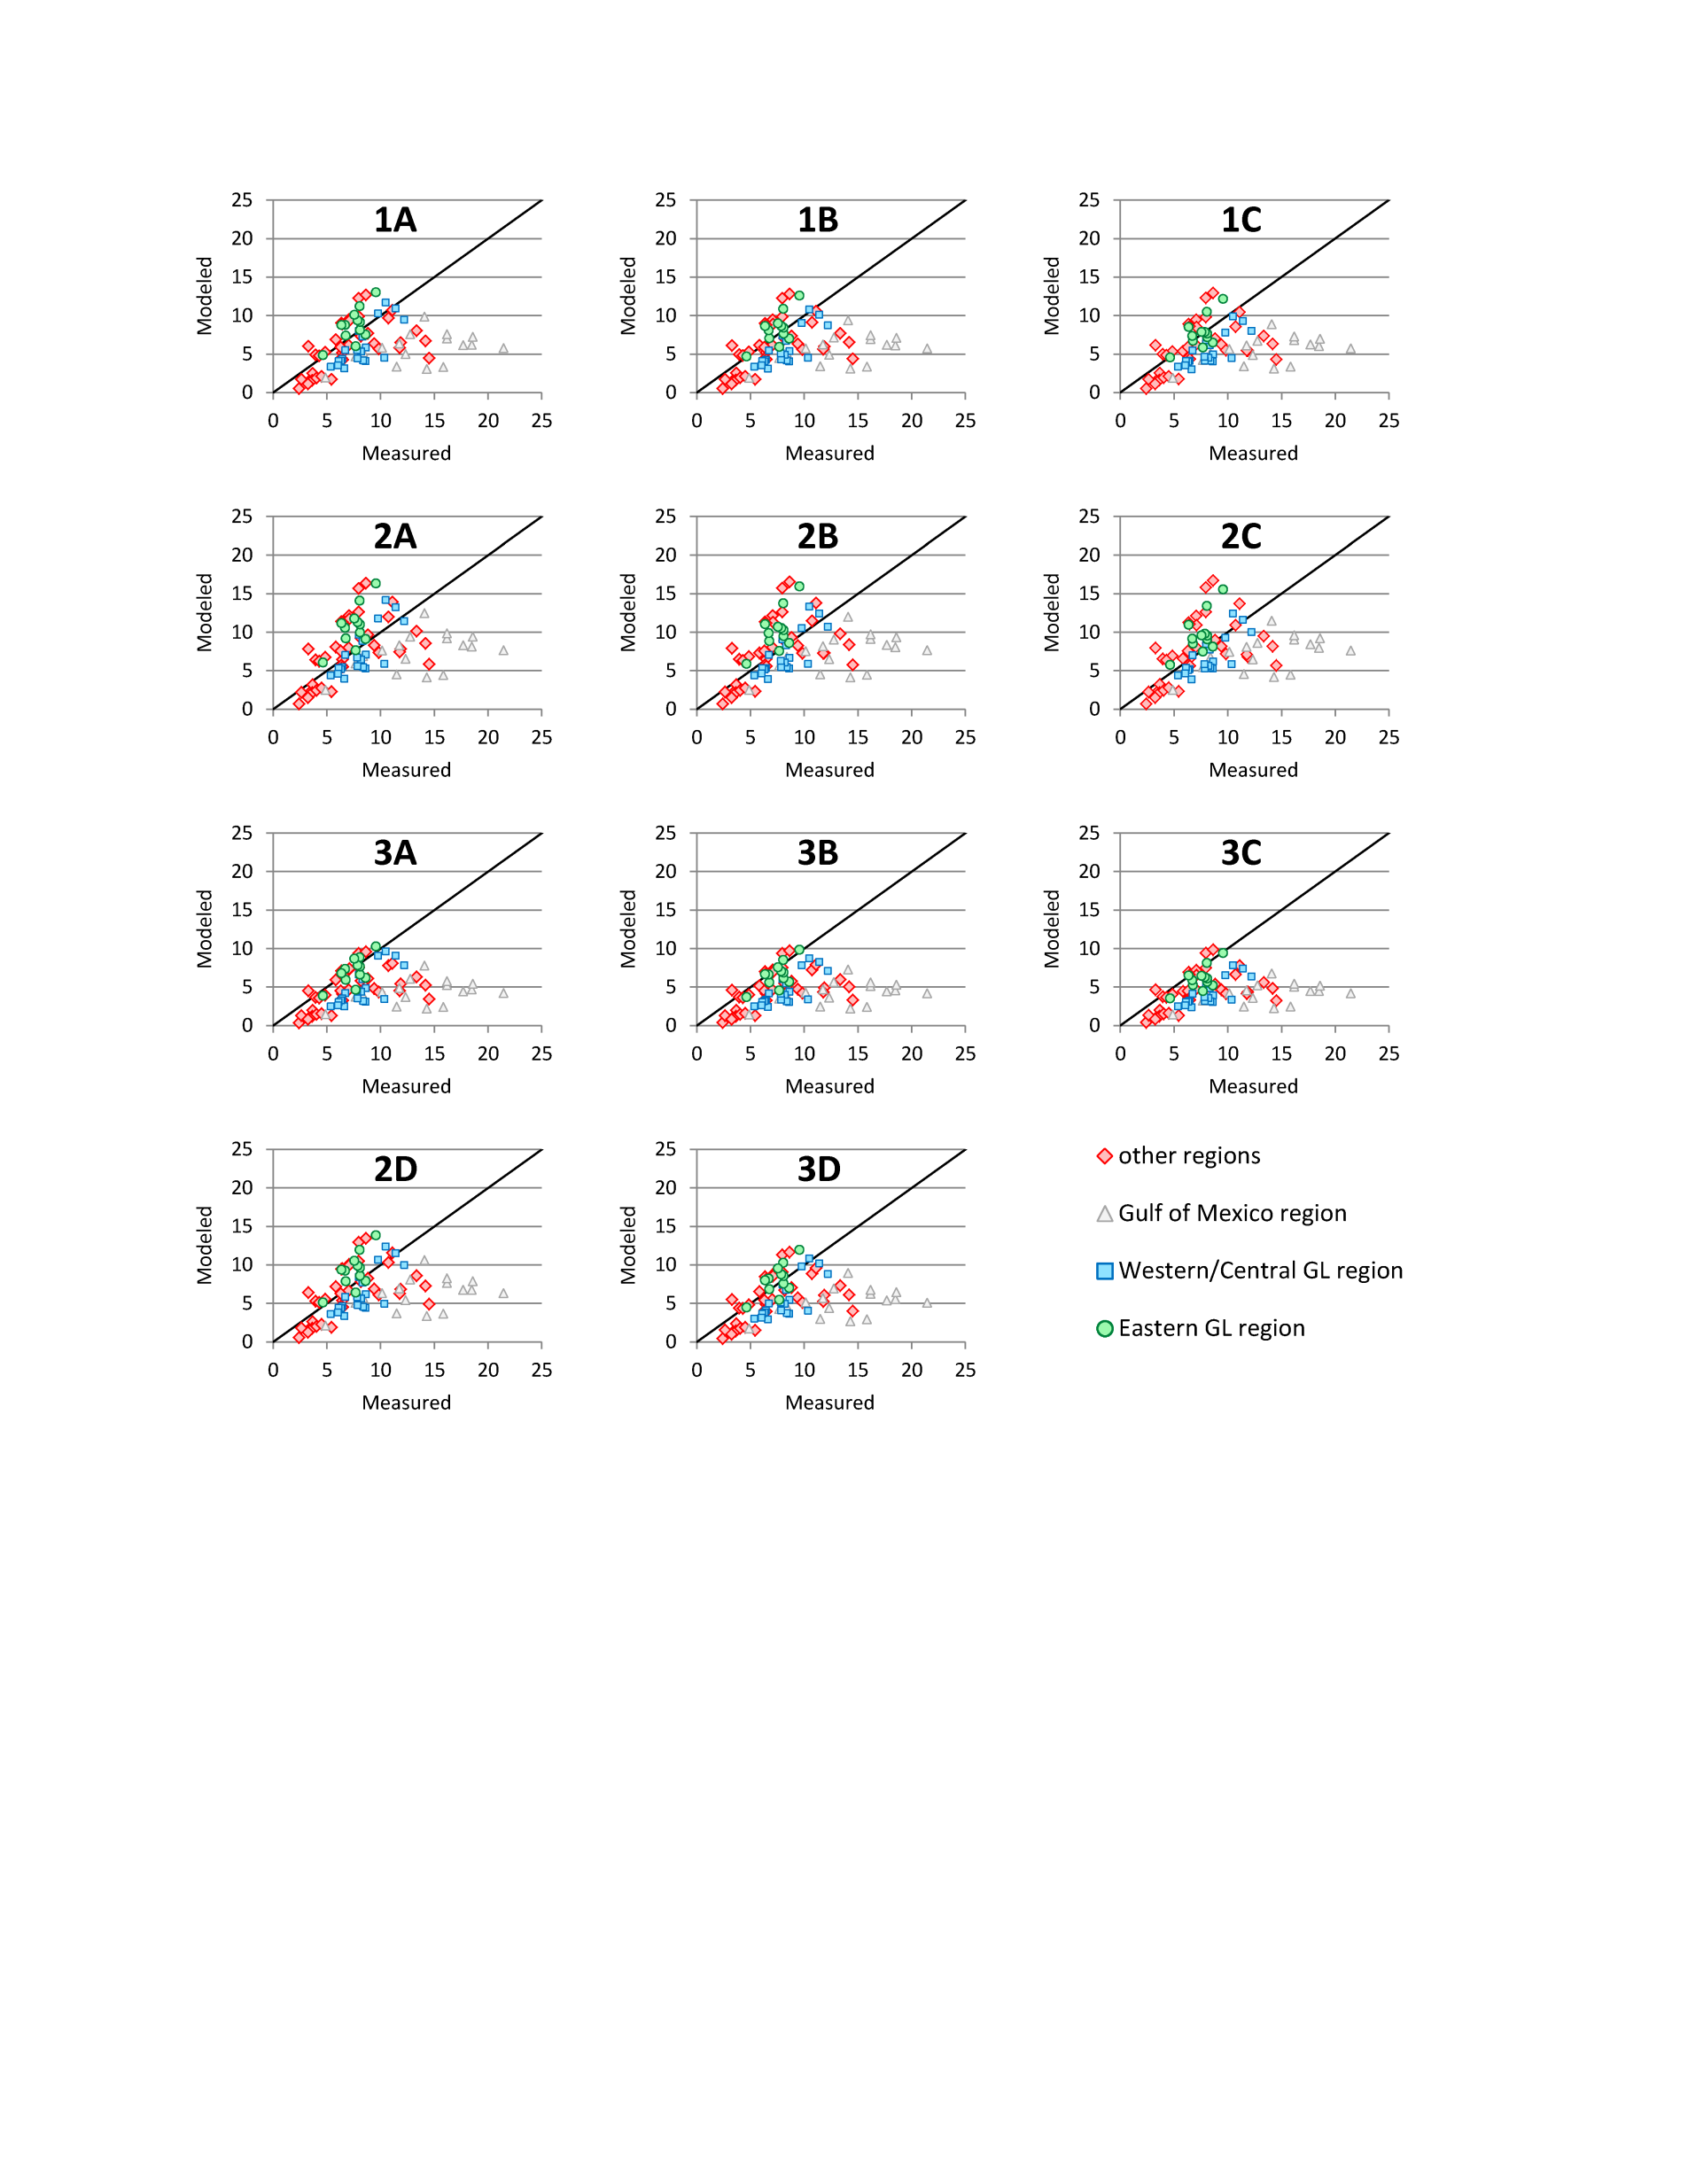

Supplement: elementa_000118_s006.docx [file elementa_000118_s006.docx]
