# Supplementary material for: Modeling the global atmospheric transport and deposition of mercury to the Great Lakes
Source: Oxford University Press journal article supplement (doi:10.12952/journal.elementa.000118), 2016-01-01

**Figure S4. Statistical distributions of modeled Hg(0) and measured TGM concentrations**

Box/whisker plots of Hg(0) concentrations (pg m-3) for measured (M), base case (1A), and other model configurations. Boxes show the 25th, 50th (median) and 75th percentile, and whiskers show the minimum and maximum values. Arithmetic mean values are shown as circles. For each site, as measurements were made almost continuously throughout the year, measured and modeled distributions are shown for hourly averages as well as daily (24-hr) averages. For the sites shown in this figure, all measurements were for Total Gaseous Mercury (TGM). Model results shown are for Hg(0). All data reported at at 0 oC and 1 atm. Both daily- and hourly-average data distributions were compared for sites where the continuity of data made this reasonable. For the average values shown in Figure 8 of the main paper, the alternative daily average values are not shown – where available -- as they are essentially identical to the hourly averages.


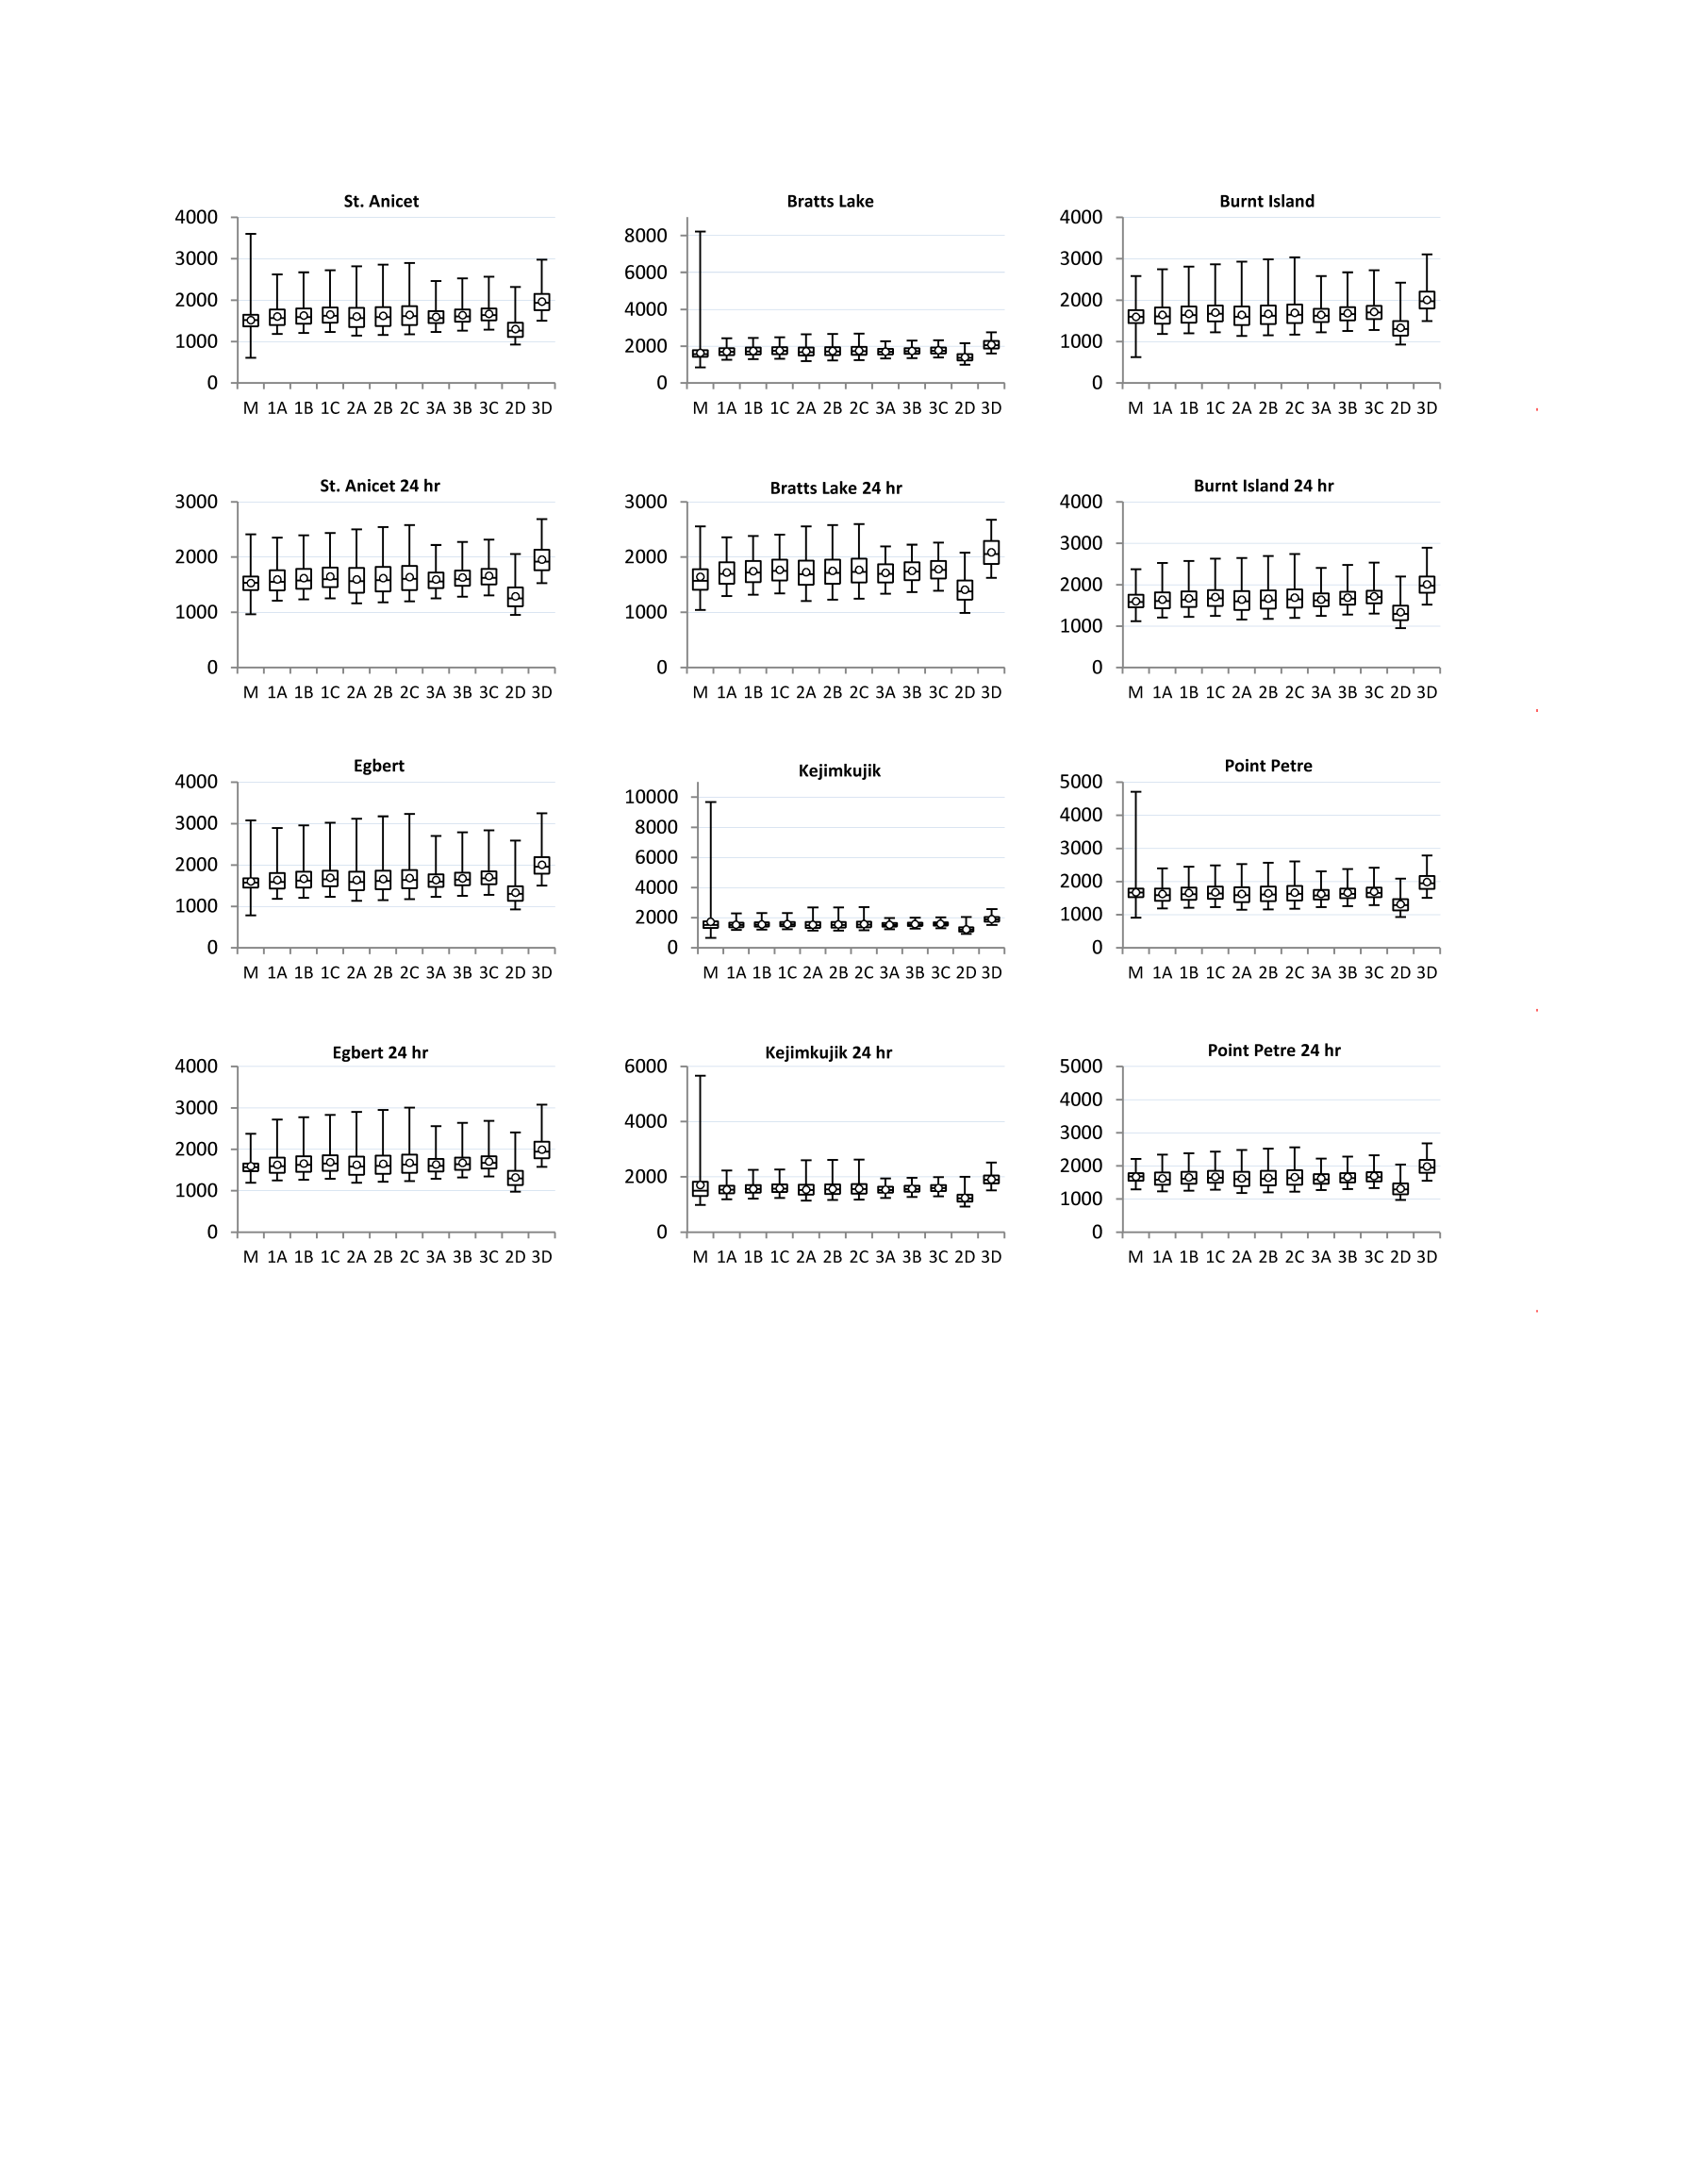

Supplement: elementa_000118_s007.docx [file elementa_000118_s007.docx]
