# Supplementary material for: Modeling the global atmospheric transport and deposition of mercury to the Great Lakes
Source: Oxford University Press journal article supplement (doi:10.12952/journal.elementa.000118), 2016-01-01

**Figure S7. Statistical distributions of total modeled Hg(p) and measured fine particle mercury concentrations**

Comparison of model results with measurements for particulate mercury, similar to that shown in Figures S4, S5, S6, and S8 for other mercury forms.


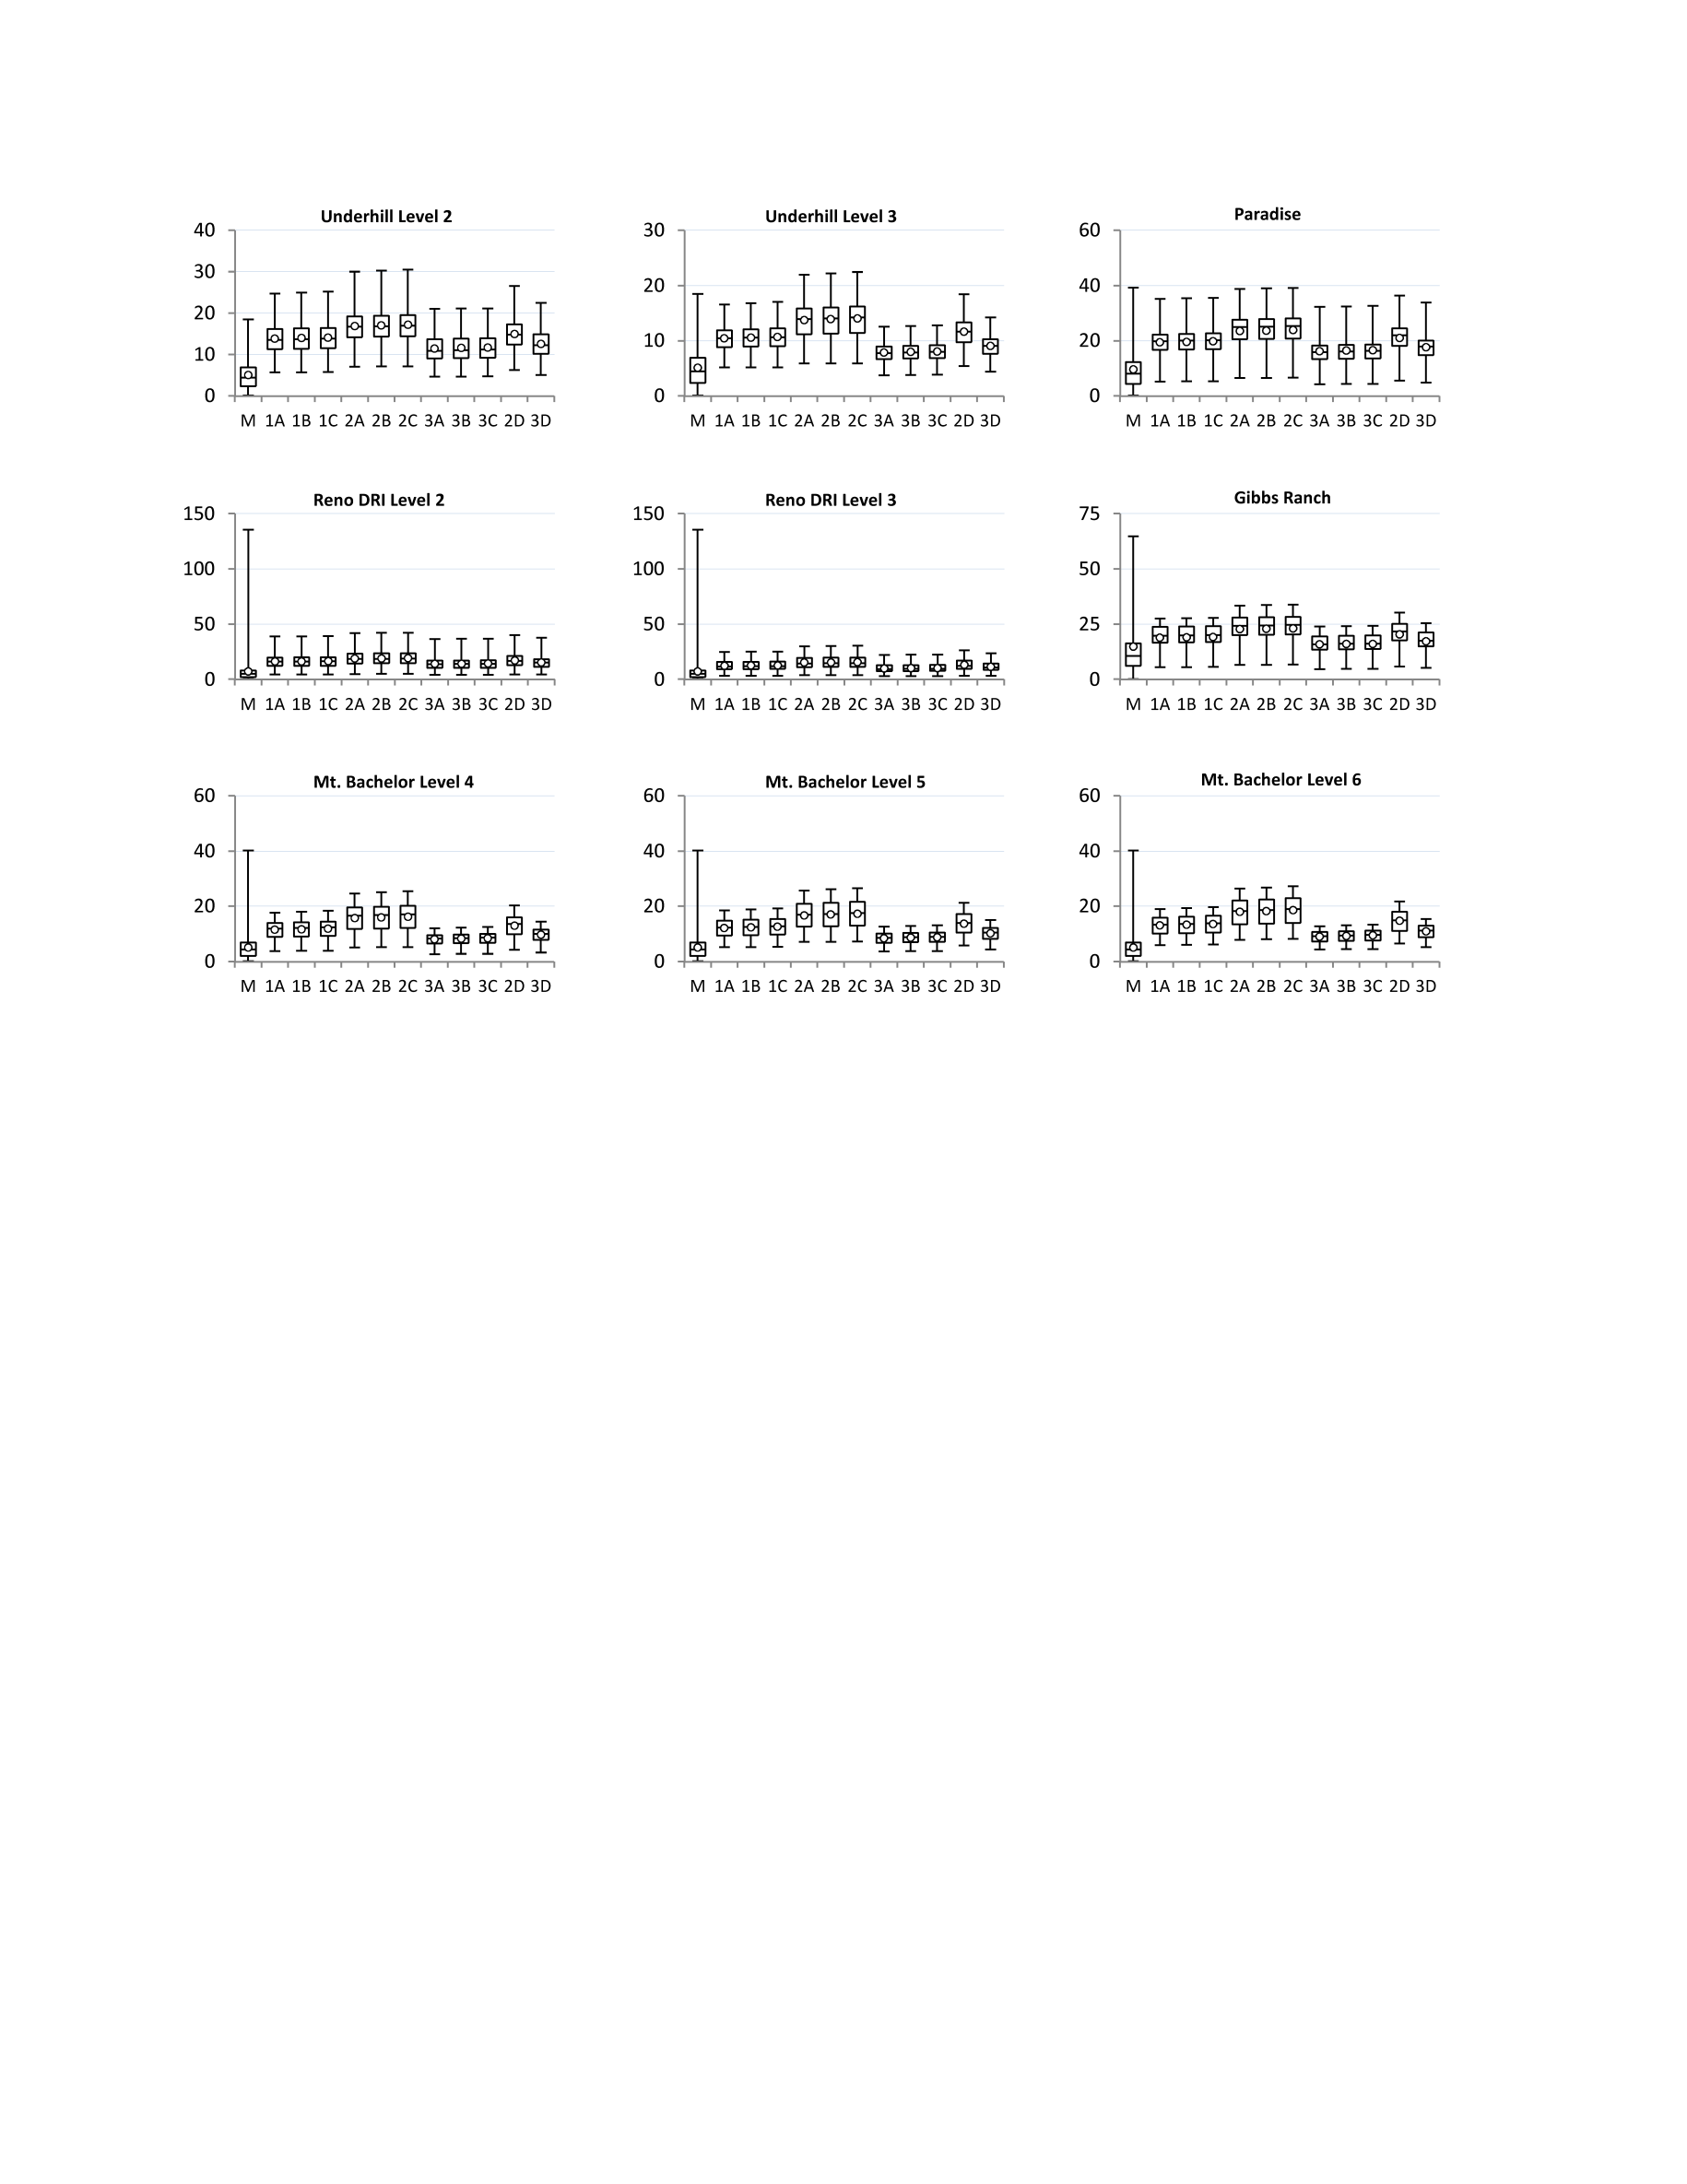

Supplement: elementa_000118_s010.docx [file elementa_000118_s010.docx]
