# Supplementary material for: Modeling the global atmospheric transport and deposition of mercury to the Great Lakes
Source: Oxford University Press journal article supplement (doi:10.12952/journal.elementa.000118), 2016-01-01
Supplement: elementa_000118_s012.docx [file elementa_000118_s012.docx]

Table S1. Gas-liquid partitioning and aqueous phase equilibrium relationships*

| # | Equilibrium | Equilibrium Constant | Units |
| --- | --- | --- | --- |
| Gas-liquid partitioning | | | |
| 1 | O3 (aq) ↔ O3 (gas) | 0.0113a | molar atm-1 |
| 2 | H2O2 (aq) ↔ H2O2 (gas) | 7.4E+04a | molar atm-1 |
| 3 | Hg(0) (aq) ↔ Hg(0) (gas) | 0.11b | molar atm-1 |
| 4 | Cl2 (aq) ↔ Cl2 (gas) | 0.076c | molar atm-1 |
| 5 | OH•(aq) ↔ OH•(gas) | 25.0a | molar atm-1 |
| 6 | SO2 (aq) ↔ SO2 (gas) | 1.23a | molar atm-1 |
| 7 | HgCl2 (aq) ↔ HgCl2 (gas) | 1.4E+06d | molar atm-1 |
| 8 | Hg(OH)2 (aq) ↔ Hg(OH)2 (gas) | 1.2E+04d | molar atm-1 |
| Aqueous-phase equilibrium relationships | | | |
| 9 | SO2 ↔ HSO3- + H+ | 0.013a | molar |
| 10 | HSO3- ↔ SO32- + H+ | 6.6E-08a | molar |
| 11 | HgCl2 ↔ Hg2+ + 2 Cl- | 1.0E-14e | molar2 |
| 12 | Hg(OH)2 ↔ Hg2+ + 2 OH- | 1.0E-22e | molar2 |
| 13 | Hg2+ + SO32- ↔ HgSO3 | 5.0E+12f | molar-1 |
| 14 | HgSO3 + SO32- ↔ Hg(SO3)22- | 2.5E+11f | molar-1 |
| 15 | Cl2-H2O ↔ HOCl + Cl- + H+ | 5.01E-04c | molar2 |
| 16 | HOCl ↔ OCl- + H+ | 3.16E-08c | molar |

* The equilibrium expressions listed in this table are based on aqueous-phase concentrations in units of *moles liter-1* (“molar”) and gas-phase concentrations in units of *atmospheres* (“atm”). These relationships are standard equilbrium ratios of the concentrations on the *right-hand side* of the relationship divided by the concentrations on the *left-hand side* of the relationship. So, for example, for #10, the expression can be written as follows, where all of the aqueous-phase concentrations are expressed in *molar* units:

[SO32- ] [H+] / [HSO3-] = 6.6E-08 molar

a. Seinfeld JH, Pandis SN. 1998. *Atmospheric Chemistry and Physics: From Air Pollution to Climate Change*. New York: John Wiley and Sons, Inc.

b. Clever HL, Johnson SA, Derrick ME. 1985. The solubility of mercury and some sparingly soluble mercury salts in water and aqueous-electrolyte solutions. *Journal of Physical and Chemical Reference Data* **14**(3): 631-681.

c. Lin CJ, Pehkonen SO. 1998. Oxidation of elemental mercury by aqueous chlorine (HOCl/OCl-): Implications for tropospheric mercury chemistry. *Journal of Geophysical Research-Atmospheres* **103**(D21): 28093-28102. doi:10.1029/98jd02304.

d. Lindqvist O, Rodhe H. 1985. Atmospheric mercury - a review. *Tellus Series B-Chemical and Physical Meteorology* **37**(3): 136-159.

e. Lin CJ, Pehkonen SO. 1999. The chemistry of atmospheric mercury: a review. *Atmospheric Environment* **33**(13): 2067-2079. doi:10.1016/s1352-2310(98)00387-2.

f. Munthe J, Xiao ZF, Lindqvist O. 1991. The aqueous reduction of divalent mercury by sulfite. *Water Air and Soil Pollution* **56**: 621-630. doi:10.1007/bf00342304.
