# Supplementary material for: Modeling the global atmospheric transport and deposition of mercury to the Great Lakes
Source: Oxford University Press journal article supplement (doi:10.12952/journal.elementa.000118), 2016-01-01
Supplement: elementa_000118_s013.docx [file elementa_000118_s013.docx]

Table S2. Average measured and modeled 2005 wet deposition fluxes (µg m-2 yr-1).

| Regiona | Number of sites | Measurement | Model Configuration | | | | | | | | | | |
| --- | --- | --- | --- | --- | --- | --- | --- | --- | --- | --- | --- | --- | --- |
| 1A | 1B | 1C | 2A | 2B | 2C | 3A | 3B | 3C | 2D | 3D |
| Base case: O-20, R-0 | O-20, R-33 | O-20, R-67 | O-33, R-0 | O-33, R-33 | O-33, R-67 | O-10, R-0 | O-10, R-33 | O-10, R-67 | O-33, base emit | O-10, base emit |
| GL-WC | 20 | 8.2 | 6.0 | 5.7 | 5.3 | 7.4 | 7.1 | 6.7 | 4.9 | 4.5 | 4.2 | 6.4 | 5.5 |
| GL-E | 12 | 7.5 | 8.7 | 8.2 | 7.7 | 10.7 | 10.2 | 9.8 | 7.1 | 6.6 | 6.1 | 9.2 | 8.1 |
| GL | 32 | 7.9 | 7.0 | 6.6 | 6.2 | 8.6 | 8.3 | 7.9 | 5.7 | 5.3 | 4.9 | 7.4 | 6.5 |
| GOM | 17 | 13.6 | 5.7 | 5.6 | 5.4 | 7.4 | 7.3 | 7.2 | 4.3 | 4.2 | 4.0 | 6.2 | 5.1 |
| Other | 37 | 7.1 | 5.9 | 5.8 | 5.7 | 7.6 | 7.5 | 7.4 | 4.6 | 4.5 | 4.4 | 6.3 | 5.4 |
| All | 86 | 8.7 | 6.3 | 6.1 | 5.9 | 7.9 | 7.7 | 7.5 | 4.9 | 4.7 | 4.5 | 6.7 | 5.8 |
| All-GOM | 69 | 7.5 | 6.4 | 6.2 | 6.0 | 8.1 | 7.8 | 7.6 | 5.1 | 4.9 | 4.6 | 6.8 | 5.9 |

a. Region: *GL-WC* = Western/Central Great Lakes; *GL-E* = Eastern Great Lakes; *GL* = Great Lakes (all); *GOM* = Gulf of Mexico; *Other* = all MDN sites other than in the Great Lakes and Gulf of Mexico regions; *All* = all MDN sites; *All – GOM* = all MDN sites except sites in the Gulf of Mexico region. See Figure 5 in the main paper for locations of each region’s sites.
