# Supplementary material for: Modeling the global atmospheric transport and deposition of mercury to the Great Lakes
Source: Oxford University Press journal article supplement (doi:10.12952/journal.elementa.000118), 2016-01-01
Supplement: elementa_000118_s016.docx [file elementa_000118_s016.docx]

Table S5. Biasa between average Hg(0) or TGM concentrations measured during 2005 and corresponding average modeled Hg(0) concentrations

| Siteb | Model Configuration | | | | | | | | | | |
| --- | --- | --- | --- | --- | --- | --- | --- | --- | --- | --- | --- |
| 1A | 1B | 1C | 2A | 2B | 2C | 3A | 3B | 3C | 2D | 3D |
| Base case: O-20, R-0 | O-20, R-33 | O-20, R-67 | O-33, R-0 | O-33, R-33 | O-33, R-67 | O-10, R-0 | O-10, R-33 | O-10, R-67 | O-33, base emit | O-10, base emit |
| STA | 6% | 7% | 9% | 6% | 7% | 9% | 6% | 8% | 10% | -14% | 30% |
| BTL | 5% | 6% | 8% | 5% | 6% | 7% | 4% | 6% | 8% | -14% | 27% |
| BRI | 3% | 5% | 6% | 3% | 4% | 6% | 3% | 5% | 7% | -16% | 25% |
| EGB | 2% | 4% | 6% | 2% | 4% | 5% | 2% | 5% | 7% | -17% | 25% |
| KEJ | -11% | -10% | -9% | -12% | -10% | -9% | -11% | -9% | -8% | -29% | 10% |
| PPT | -3% | -1% | 0% | -3% | -1% | 0% | -3% | -1% | 1% | -21% | 19% |
| Median of above | 3% | 5% | 6% | 3% | 4% | 6% | 3% | 5% | 7% | -17% | 25% |
| ALT | -11% | -10% | -9% | -12% | -11% | -10% | -10% | -8% | -7% | -30% | 11% |
| UND | 9% | 11% | 13% | 11% | 12% | 13% | 8% | 10% | 12% | -11% | 34% |
| UND (L3) | 5% | 7% | 9% | 5% | 7% | 8% | 5% | 8% | 9% | -15% | 30% |
| MBO (L4) | 19% | 21% | 22% | 20% | 21% | 22% | 18% | 21% | 23% | -3% | 44% |
| MBO (L5) | 10% | 12% | 14% | 8% | 10% | 11% | 11% | 14% | 16% | -12% | 36% |
| MBO (L6) | 1% | 3% | 5% | -3% | -2% | 0% | 5% | 7% | 10% | -21% | 28% |
| PTD | -33% | -32% | -30% | -32% | -31% | -30% | -34% | -32% | -31% | -45% | -19% |
| STK | -34% | -33% | -31% | -33% | -32% | -31% | -34% | -32% | -31% | -45% | -21% |
| DRI | 17% | 19% | 20% | 17% | 18% | 20% | 17% | 20% | 22% | -2% | 40% |
| DRI (L3) | 3% | 5% | 7% | 2% | 3% | 4% | 5% | 7% | 9% | -16% | 26% |
| PAR | -24% | -23% | -22% | -24% | -23% | -22% | -25% | -23% | -22% | -35% | -11% |
| GBR | -7% | -6% | -5% | -6% | -5% | -4% | -8% | -6% | -5% | -20% | 8% |
| Median (all) | 3% | 5% | 6% | 2% | 4% | 5% | 4% | 6% | 8% | -17% | 26% |

a. *Bias* = (modeled concentration / measured concentration) – 1.0. Bias is expressed as a percentage, i.e., a bias value of 0.20 is shown as 20% in the above table.

b. Definitions of site abbreviations and specifications of measurements made at each site -- e.g., Hg(0) or Total Gaseous Mercury (TGM) -- are given in Table 2 of the main paper. All model results represent model output for the first surface level (L2) unless otherwise indicated (e.g., L3).
